# Supplementary material for: Squalene-Based Nano-Assemblies Improve the Pro-Autophagic Activity of Trehalose
Source: MDPI journal article supplement (doi:10.3390/pharmaceutics14040862), 2022-04-14

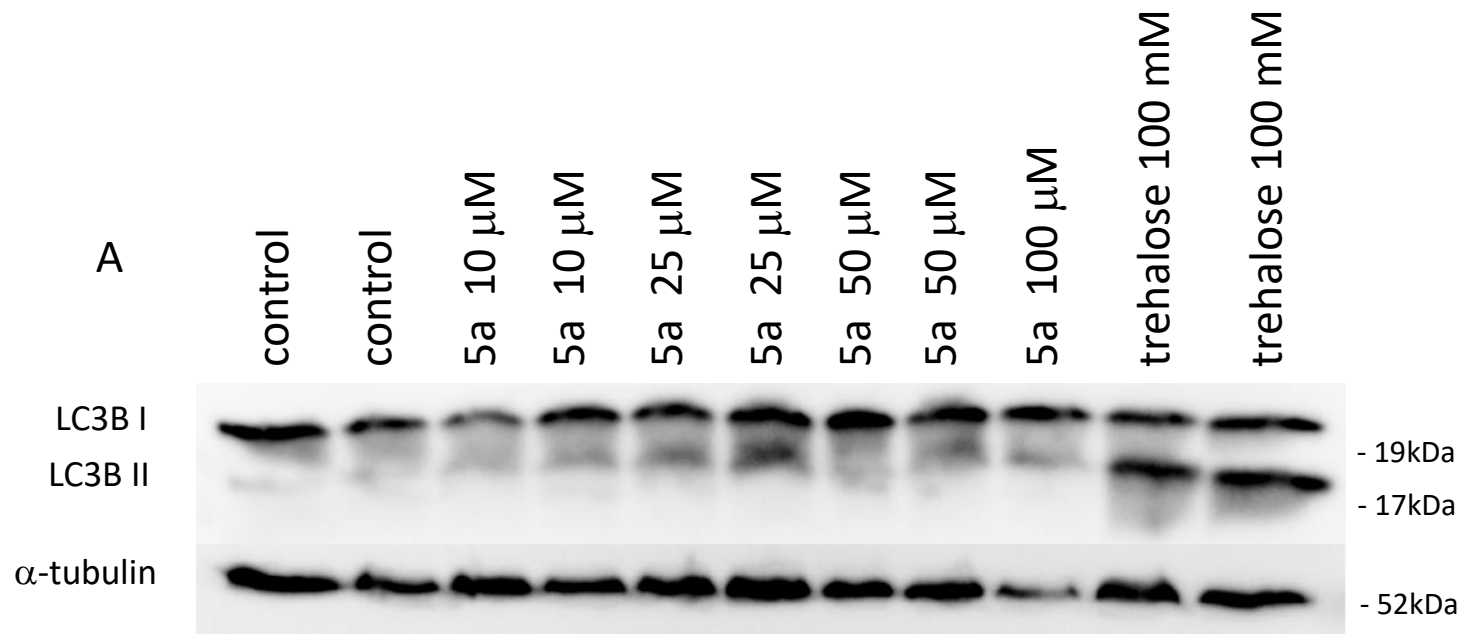

(A) Evaluation of autophagy induction in HEK293 cells treated for 24 hours with trehalose and **5a**. Upon treatment, we analyzed tubulin, LC3BI and II levels by western blotting.

(B) The graph shows LC3BII amount expressed as fold over α-tubulin. Data are expressed as mean ± S.E.; \* < p<0.05, \*\* p<0.01, \*\*\* p<0.001 versus control, n=4-5.

(C) The graph shows LC3BII/LC3BI ratio. Each value was normalized on proper control. Data are expressed as mean ± S.E.; \* < p<0.05, \*\* p<0.01 versus control, n=4-5.

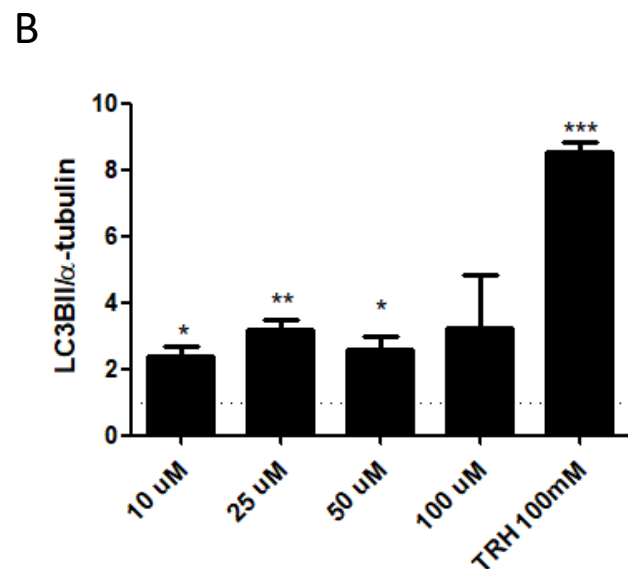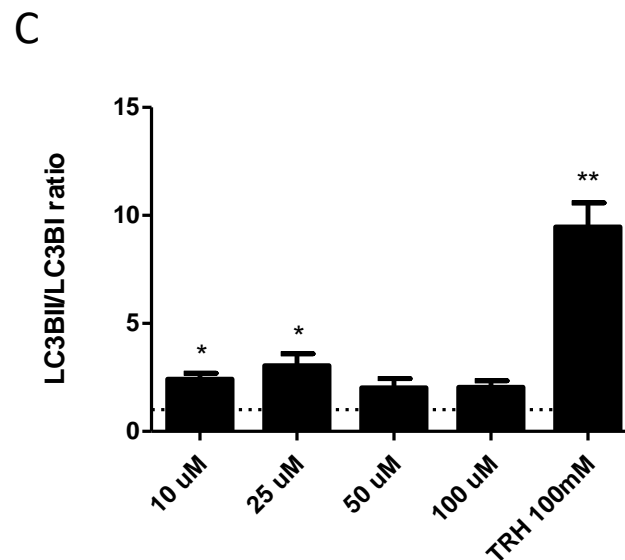

**Figure S2A**

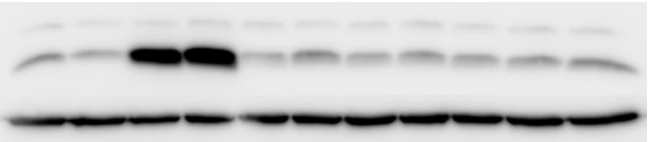

**LC3 B**

**IMG PAPER**

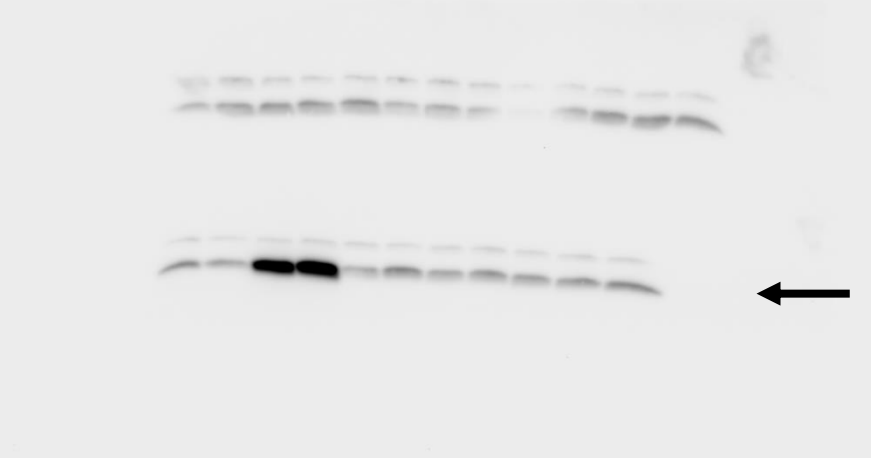

**IMG HIGH EXPOSURE**

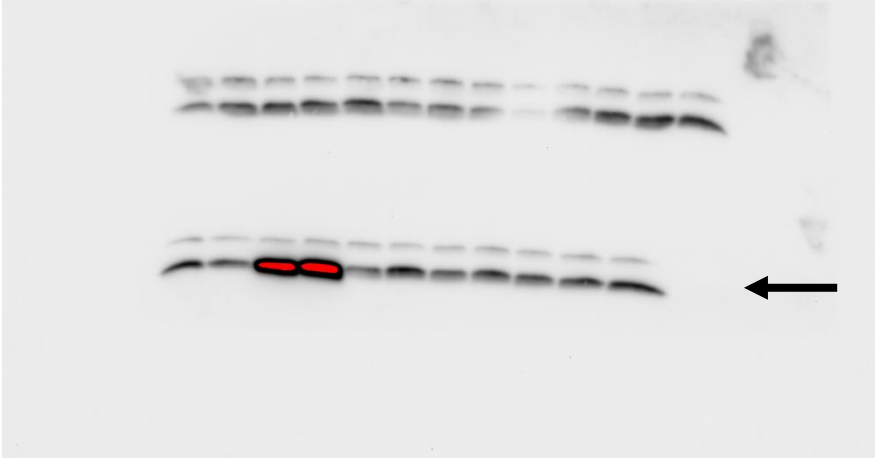

**Alpha- tubulin**

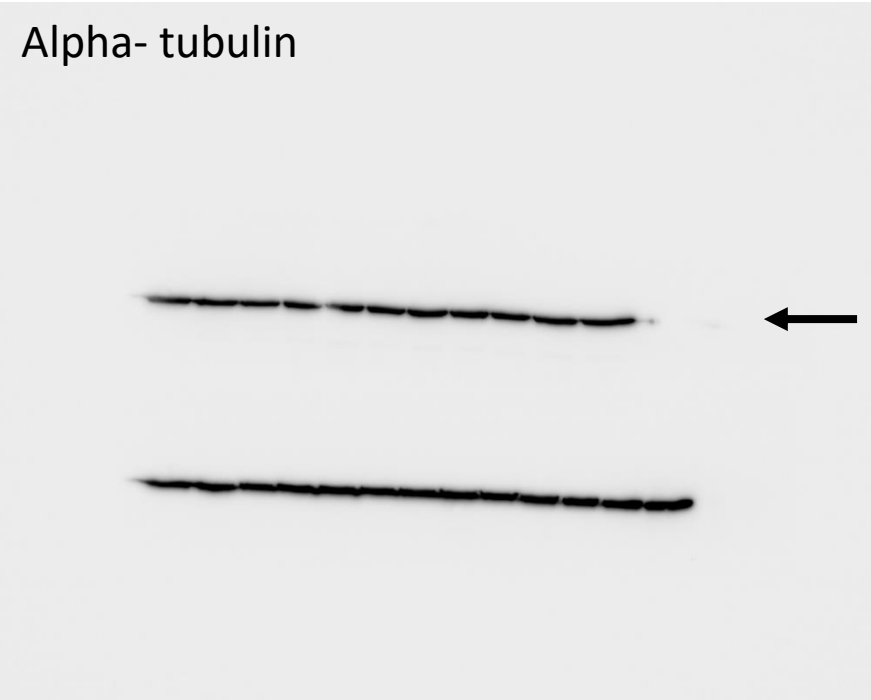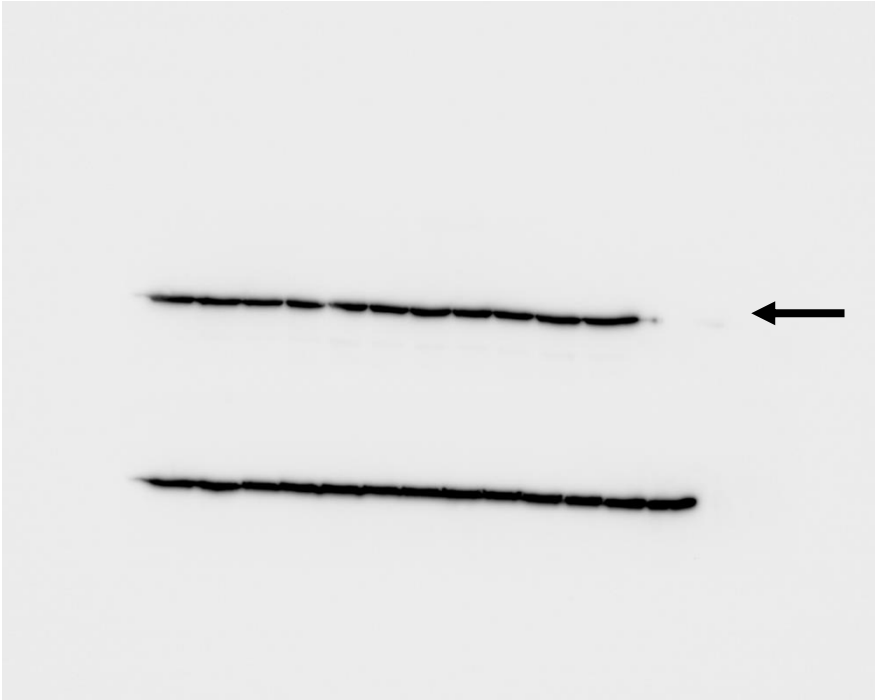

**Figure S2B**

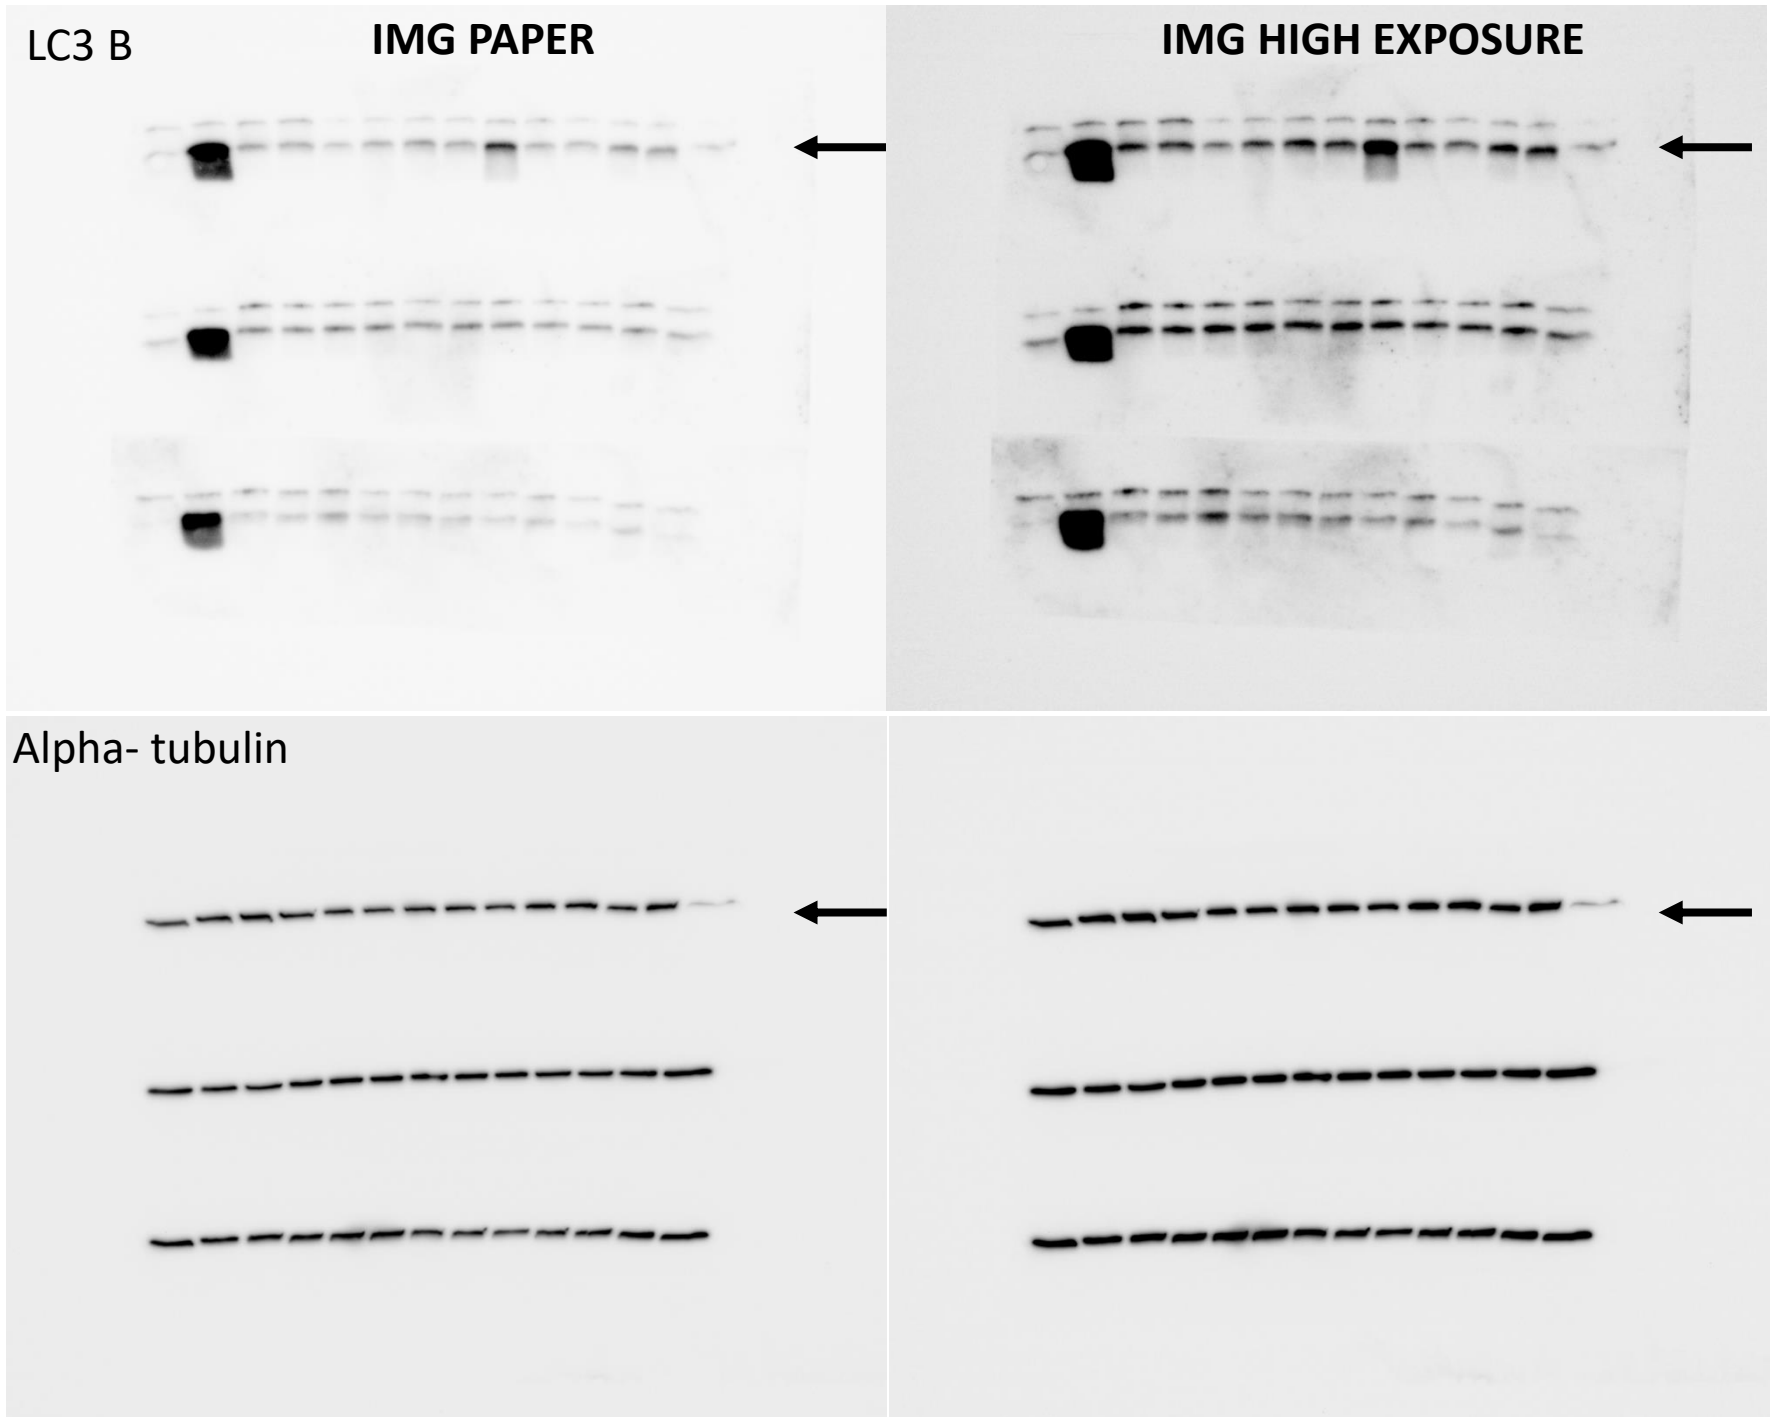

Figure S2C

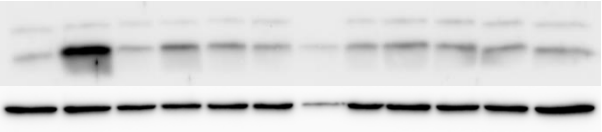

LC3 B

IMG PAPER

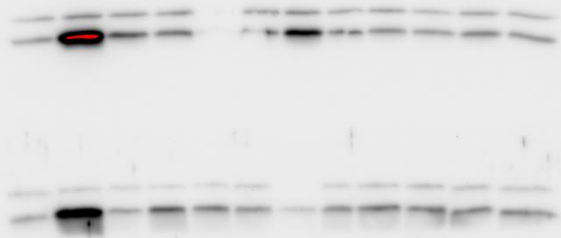

IMG HIGH EXPOSURE

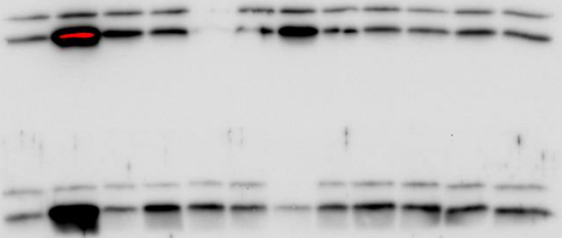

Alpha- tubulin

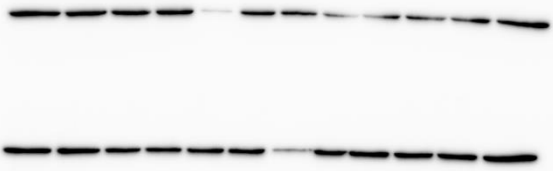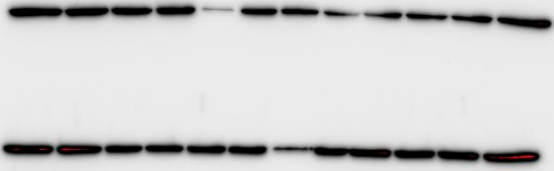

Figure S3

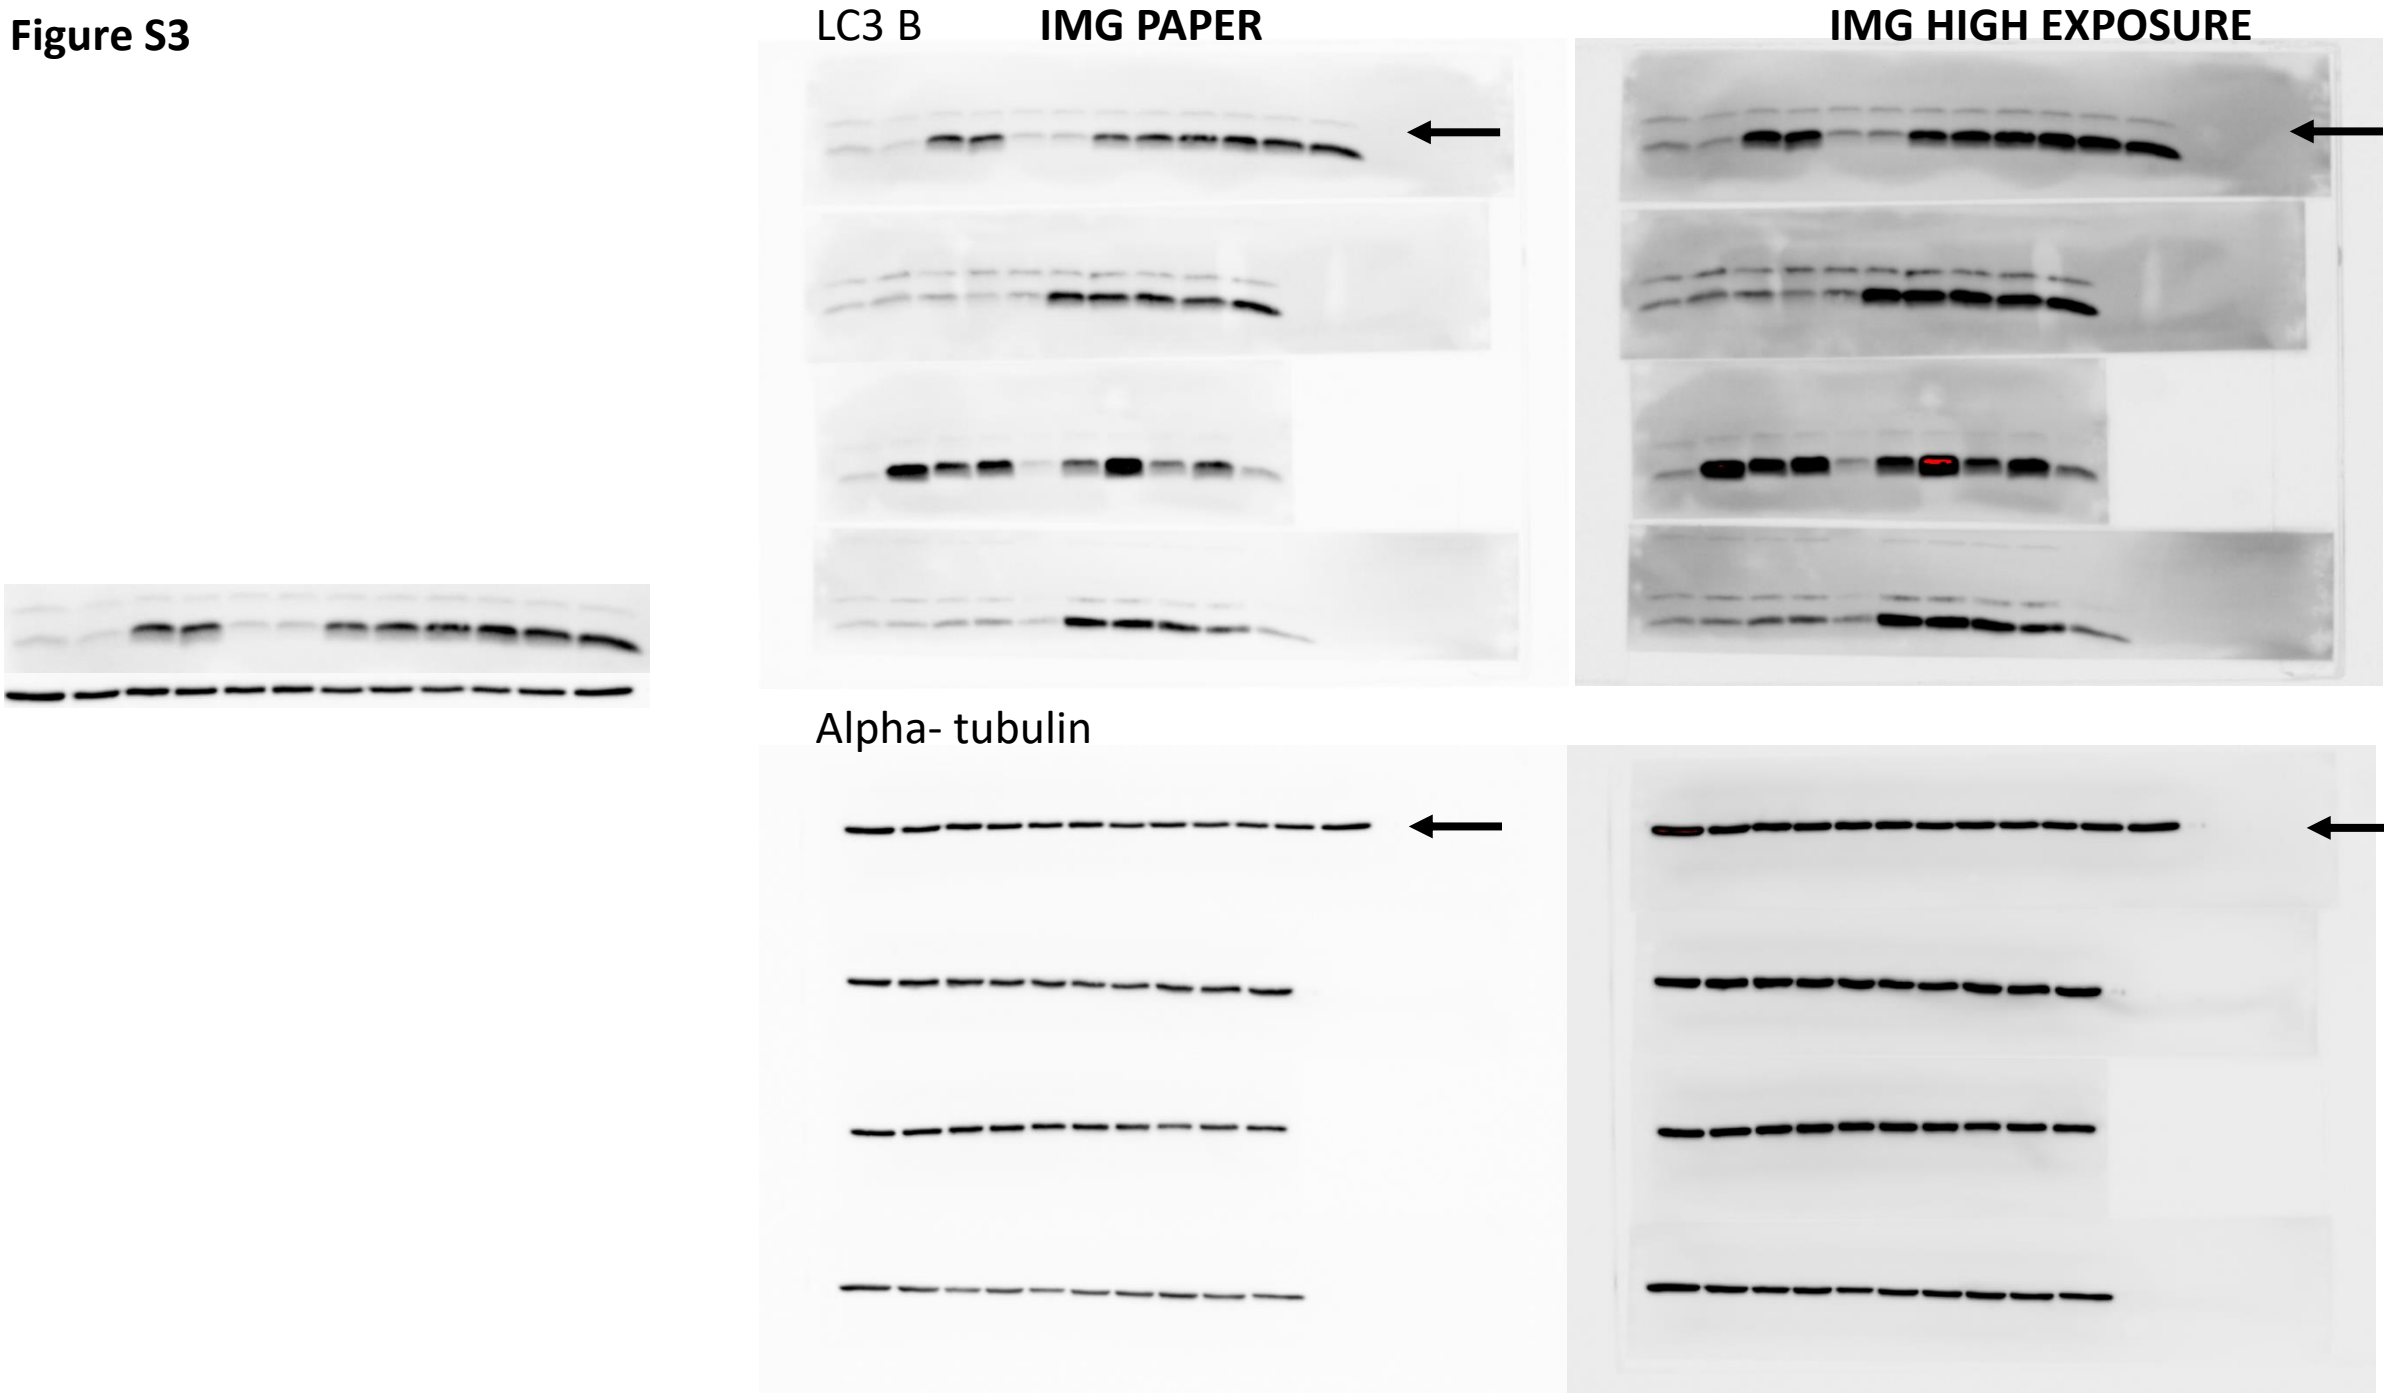

**Figure S4**

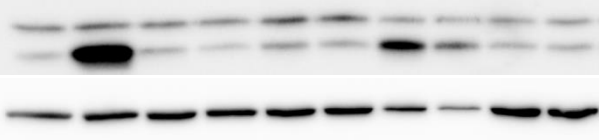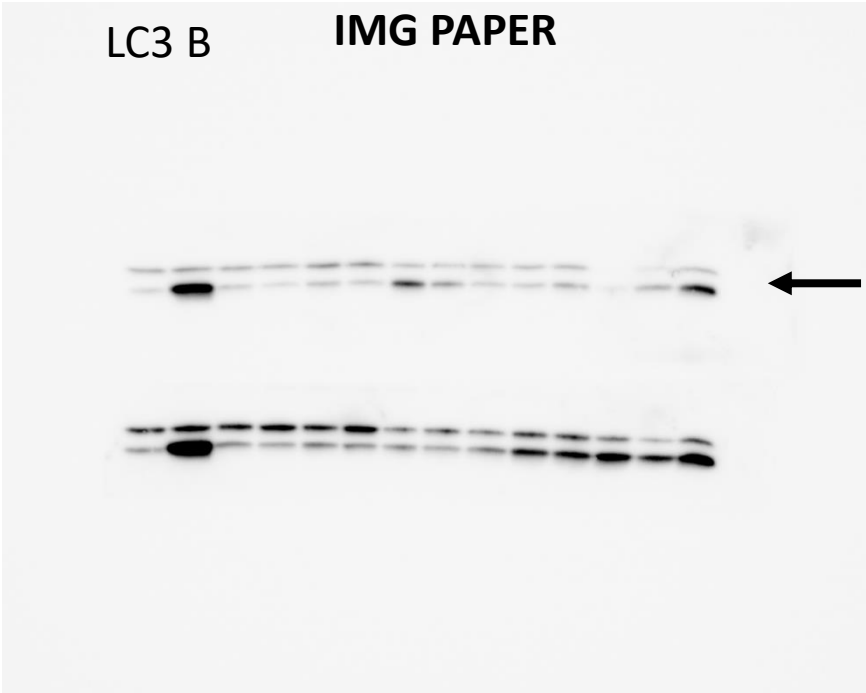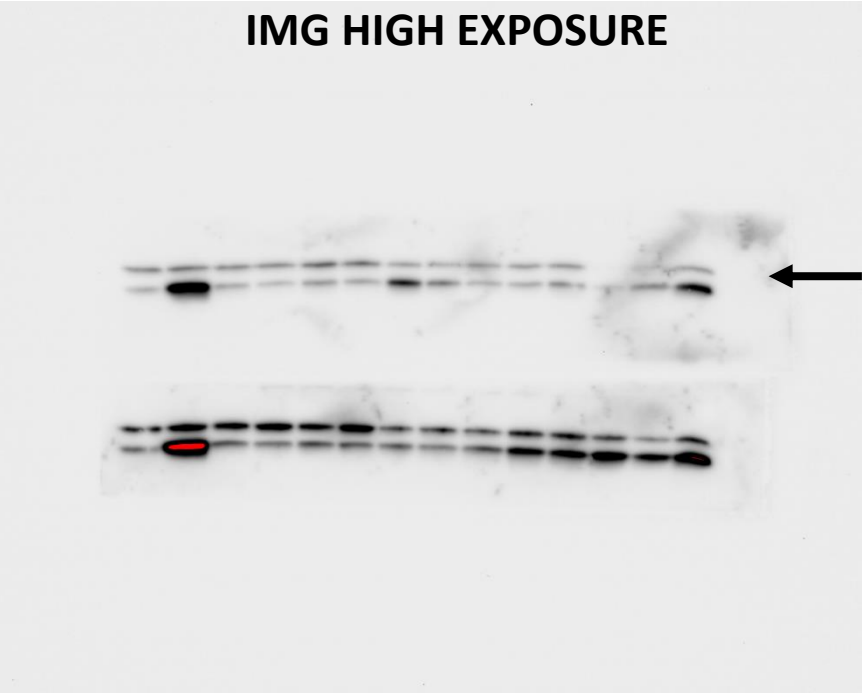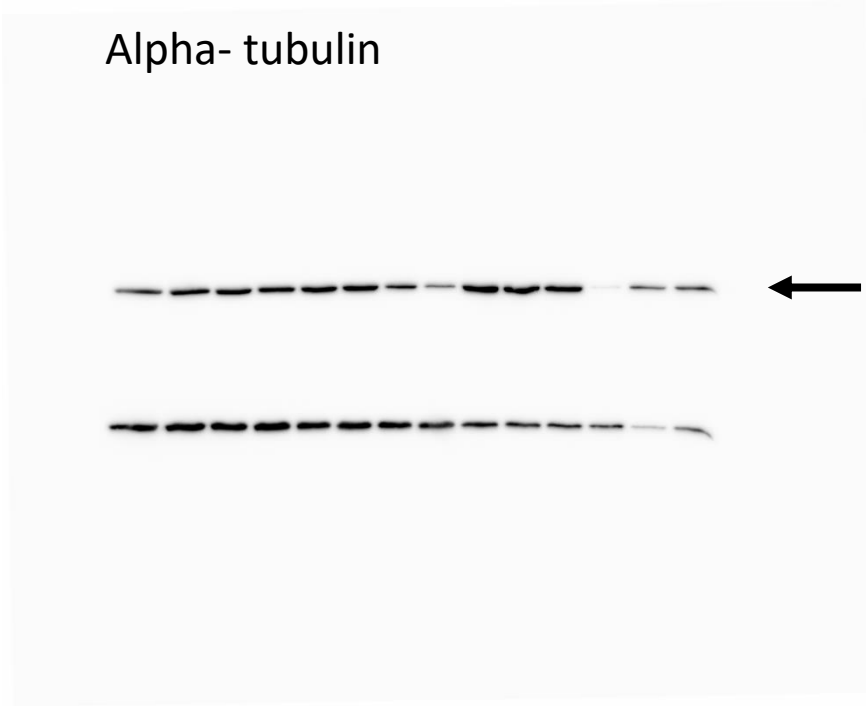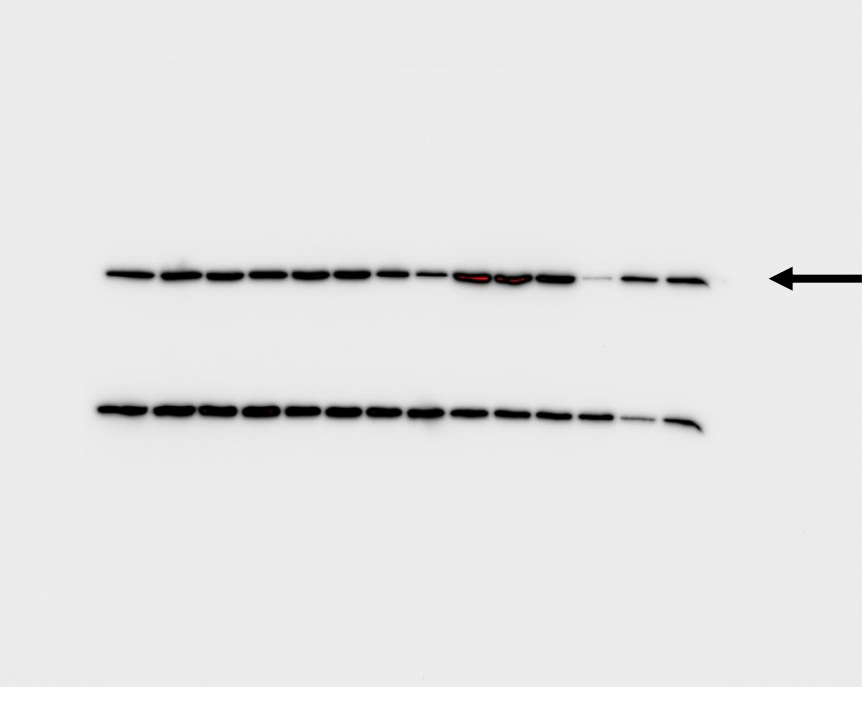

Supplement: s1 [file s1]
